# Supplementary material
Source: Springer Nature journal article supplement (https://www.springermedizin.de/resource/supplementary/13256_2011_1909_MOESM1_ESM.pdf/9648684)

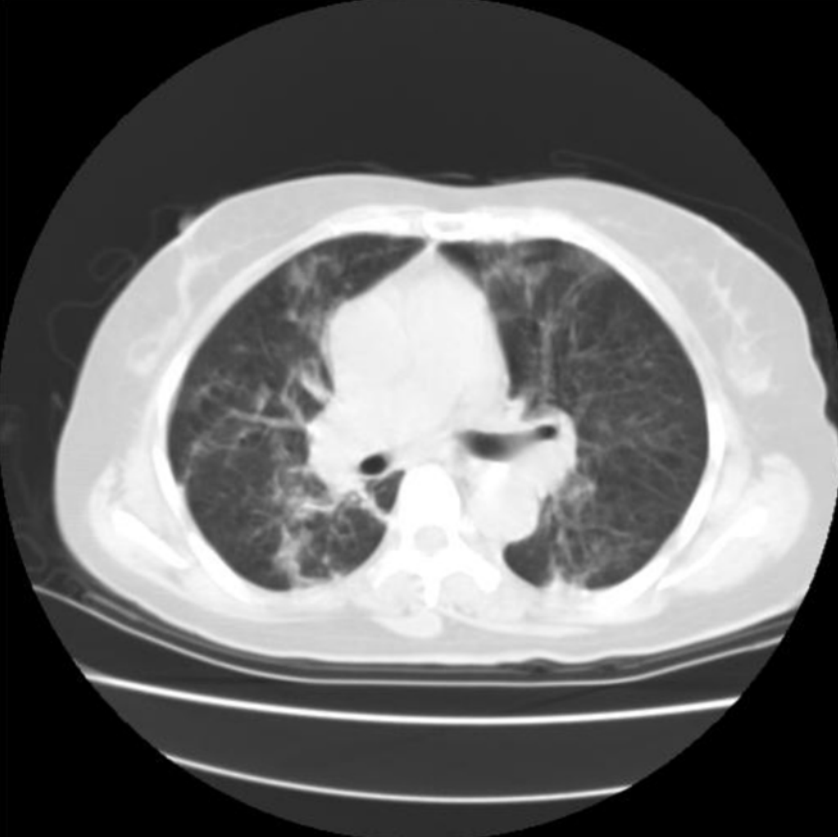

Supplement: MOESM1 [file 9648684]
